# Supplementary material
Source: Royal Society of Chemistry journal article supplement (doi:10.1039/d6tc00442c)
Supplement: d6tc00442c1.pdf [file d6tc00442c1.pdf]

## Supporting Information

### Multimodal Mechanoluminescence Regulation and Mechanism Study of $\text{CaYAl}_3\text{O}_7:\text{Eu}^{2+}, \text{Eu}^{3+}$ Under Light Irradiation

Chuang Li,<sup>a</sup> Ling He,<sup>\*a</sup> Xian Hou,<sup>a</sup> Weimin Sun,<sup>b</sup> Kangle Wang<sup>a</sup> and Zuoyan Chen<sup>c</sup>

a. School of Materials Science and Engineering, Lanzhou University of Technology, Lanzhou, 730050, Gansu, China.

b. School of Metallurgy and Environment, Lanzhou University of Technology, Lanzhou, 730050, Gansu, China.

c. Gansu Institute of Natural Energy, 730046, Gansu, China.

Corresponding Author: Ling He Email: hlswm@163.com

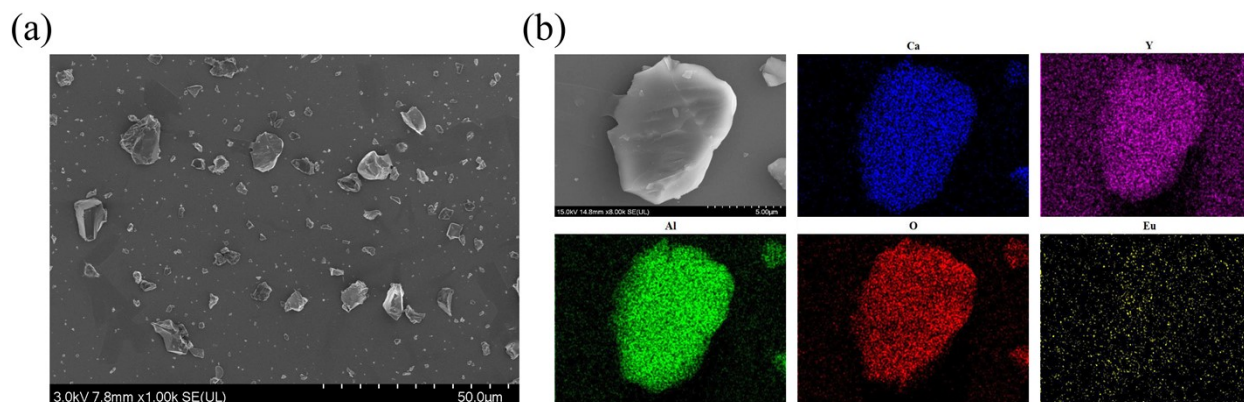

Fig. S1 (a) SEM image of the  $\text{CaYAl}_3\text{O}_7:0.02\text{Eu}$  sample (b) EDS spectrum of the  $\text{CaYAl}_3\text{O}_7:0.02\text{Eu}$  sample.
